# Supplementary material for: Primary Resistance to PD-1-Based Immunotherapy—A Study in 319 Patients with Stage IV Melanoma
Source: PubMed Central journal article supplement (PMC7226601; doi:10.3390/cancers12041027), 2020-04-22
Supplement: cancers-12-01027-s001.pdf [file cancers-12-01027-s001.pdf]

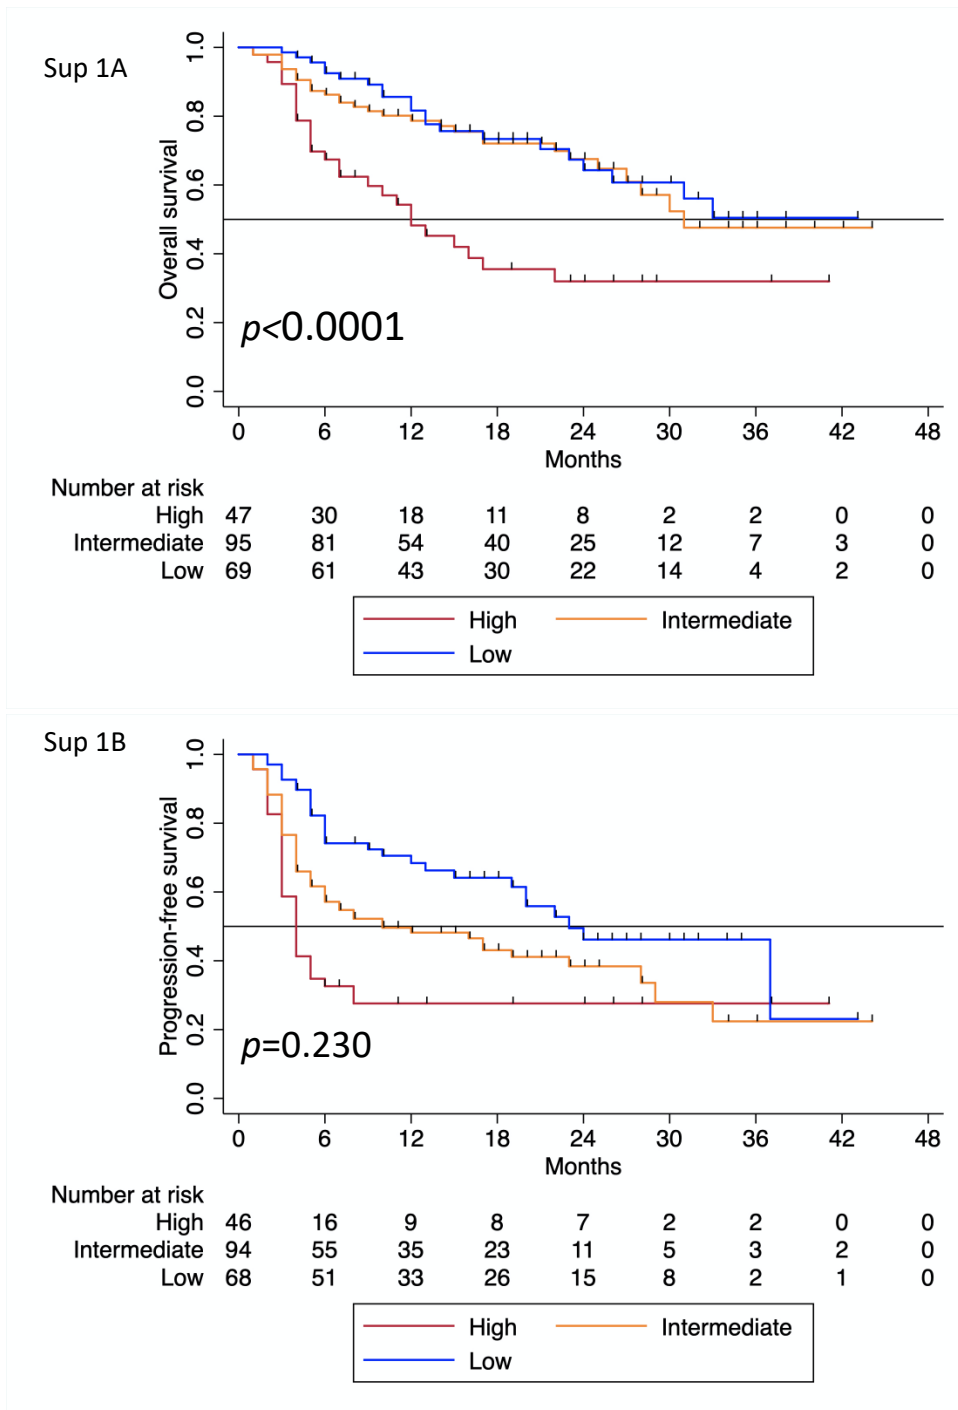

**Figure 1.** (A). Overall survival according to risk groups (low, intermediate and high) ( $p < 0.0001$ ). The factors used were primary tumor localization and protein S-100B level. The subgroups were defined as follows: no risk factor (low), one risk factor (intermediate) and two risk factors (high). (B). Progression-free survival according to risk groups (low, intermediate and high) ( $p = 0.230$ ). The factors used were primary tumor localization and protein S-100B level. The subgroups were defined as follows: no risk factor (low), one risk factor (intermediate) and two risk factors (high).

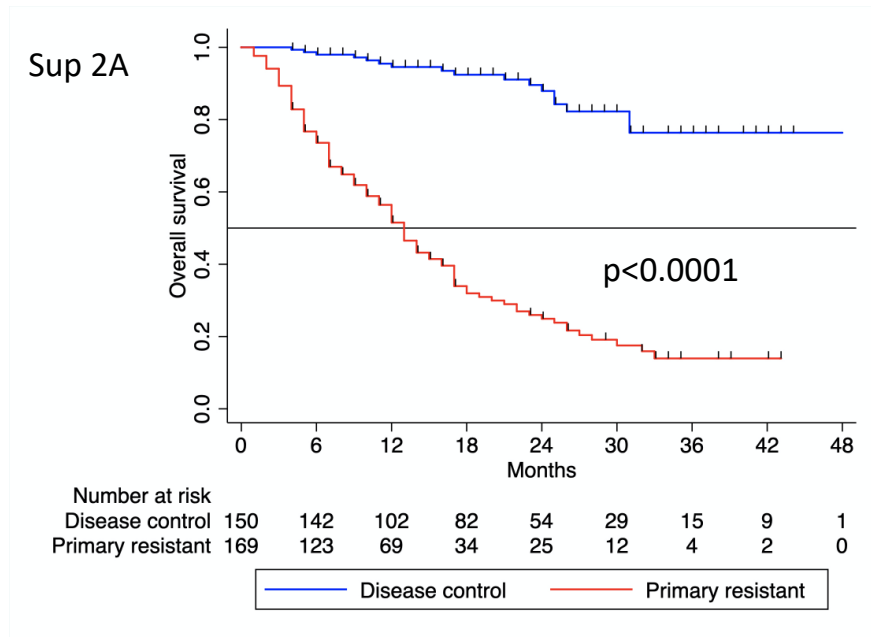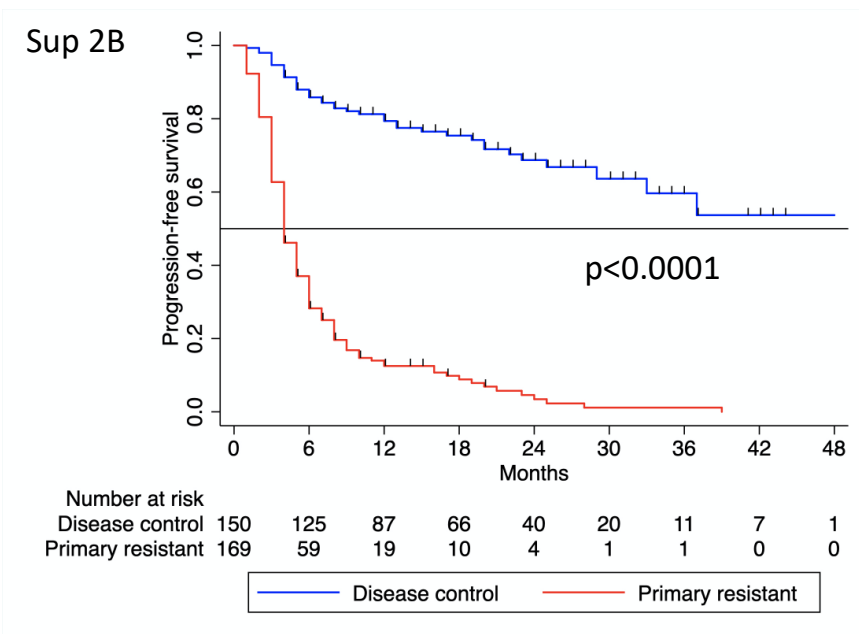

**Figure S2. (A).** Overall survival for the disease control group (complete response, partial response and stable disease for more than 6 months) and primary resistance (progressive disease and stable disease for less than 6 months). **(B).** Progression-free survival for the disease control group (complete response, partial response and stable disease for more than 6 months) and primary resistance (progressive disease and stable disease for less than 6 months).

**Table S1.** Patients characteristics and univariate analysis for the whole cohort. In this analysis, the primary resistance group includes progressive disease at the time of first tumor response evaluation after immunotherapy plus stable disease for less than 6 months. The disease control group includes complete response, partial response and stable disease for longer than 6 months.

| Characteristics                         | ICI Cohort<br>n = 319<br>N (%) | N (%)                                           |                                        | Univariate Analysis<br>$\chi^2$ test♣ |
|-----------------------------------------|--------------------------------|-------------------------------------------------|----------------------------------------|---------------------------------------|
|                                         |                                | Primary Resistance<br>PD, SD<6m<br>n = 169 (47) | DC<br>CR, PR, SD > 6 m<br>n = 150 (63) |                                       |
| <b>Age distribution</b>                 |                                |                                                 |                                        |                                       |
| Median (years [IQR])                    | 68 [56-77]                     | 67 [54-78]                                      | 68 [57-77]                             | 0.947                                 |
| <60y                                    | 101 (32)                       | 54 (35)                                         | 47 (37)                                |                                       |
| 60y-75y                                 | 114 (36)                       | 59 (32)                                         | 55 (31)                                |                                       |
| >75y                                    | 104 (32)                       | 56 (33)                                         | 48 (32)                                |                                       |
| <b>Sex</b>                              |                                |                                                 |                                        |                                       |
| Male                                    | 192 (60)                       | 93 (55)                                         | 99 (66)                                | 0.046                                 |
| Female                                  | 127 (40)                       | 76 (45)                                         | 51 (34)                                |                                       |
| <b>Tumor localization*</b>              |                                |                                                 |                                        |                                       |
| Head and neck                           | 54 (22)                        | 18 (15)                                         | 36 (28)                                | 0.008                                 |
| Trunk                                   | 73 (29)                        | 32 (26)                                         | 41 (32)                                |                                       |
| Extremity                               | 109 (43)                       | 66 (53)                                         | 43 (34)                                |                                       |
| Other                                   | 15 (6)                         | 7 (6)                                           | 8 (6)                                  |                                       |
| <b>Histological subtype*</b>            |                                |                                                 |                                        |                                       |
| SSM                                     | 76 (32)                        | 42 (36)                                         | 34 (28)                                | 0.004                                 |
| NM                                      | 72 (30)                        | 27 (23)                                         | 45 (37)                                |                                       |
| LMM                                     | 13 (6)                         | 2 (2)                                           | 11 (9)                                 |                                       |
| ALM                                     | 30 (12)                        | 21 (17)                                         | 9 (8)                                  |                                       |
| Mucosal                                 | 15 (6)                         | 7 (6)                                           | 8 (7)                                  |                                       |
| Other                                   | 32 (14)                        | 19 (16)                                         | 13 (11)                                |                                       |
| <b>Stage at initial diagnosis*</b>      |                                |                                                 |                                        |                                       |
| I                                       | 48 (17)                        | 26 (18)                                         | 22 (17)                                | 0.087                                 |
| II                                      | 84 (31)                        | 34 (24)                                         | 50 (38)                                |                                       |
| III                                     | 95 (35)                        | 52 (37)                                         | 43 (32)                                |                                       |
| IV                                      | 47 (17)                        | 29 (21)                                         | 18 (14)                                |                                       |
| <b>Number of organs with metastases</b> |                                |                                                 |                                        |                                       |
| 1-3                                     | 285 (89)                       | 145 (86)                                        | 150 (93)                               | 0.030                                 |
| >3                                      | 34 (11)                        | 24 (14)                                         | 10 (7)                                 |                                       |
| <b>Brain metastases</b>                 |                                |                                                 |                                        |                                       |
| No                                      | 258 (81)                       | 137 (81)                                        | 121 (81)                               | 0.928                                 |
| Yes                                     | 61 (19)                        | 32 (19)                                         | 29 (19)                                |                                       |
| <b>Liver metastases</b>                 |                                |                                                 |                                        |                                       |
| No                                      | 204 (64)                       | 102 (60)                                        | 102 (68)                               | 0.156                                 |
| Yes                                     | 115 (36)                       | 67 (40)                                         | 48 (32)                                |                                       |
| <b>BRAF mutation*</b>                   |                                |                                                 |                                        |                                       |
| BRAFmut                                 | 88 (45)                        | 43 (43)                                         | 45 (47)                                | 0.582                                 |
| BRAFwt                                  | 106 (56)                       | 56 (57)                                         | 50 (53)                                |                                       |
| <b>LDH level*</b>                       |                                |                                                 |                                        |                                       |
| Normal                                  | 190 (68)                       | 93 (64)                                         | 97 (72)                                | 0.167                                 |
| Elevated                                | 90 (32)                        | 52 (36)                                         | 38 (28)                                |                                       |
| <b>S100B level*</b>                     |                                |                                                 |                                        |                                       |
| Normal                                  | 157 (56)                       | 70 (48)                                         | 87 (64)                                | 0.010                                 |
| Elevated                                | 125 (44)                       | 75 (52)                                         | 50 (36)                                |                                       |

\* patients with no information available were excluded in the respective analysis; m=months; IQR = interquartile range; ♣ Chi-square test performed between the two groups – primary resistance and disease control; ICI= immune-checkpoint inhibitors; y= years; SSM = superficial spreading melanoma; NM = nodular melanoma; LMM = lentigo malignant melanoma; ALM = acral lentiginous melanoma; BRAFmut = presence of BRAFV600E/K mutation; BRAFwt = BRAF wild-type; LDH = lactate dehydrogenase; S100B = tumor marker protein S100B.

**Table S2.** Patients characteristics and univariate analysis for the whole cohort according to type of first line immunotherapy.

| Characteristics                         | ICI Cohort<br>n = 319<br>n (%) | N (%)                       |                                | Univariate<br>Analysis<br>$\chi^2$ test♣ |
|-----------------------------------------|--------------------------------|-----------------------------|--------------------------------|------------------------------------------|
|                                         |                                | PD-1 Mono<br>n = 174 (54.5) | PD-1 + CTLA4<br>n = 145 (45.5) |                                          |
| <b>Age distribution</b>                 |                                |                             |                                |                                          |
| Median (years [IQR])                    | 68 [56-77]                     | 70 [59-79]                  | 67 [52-75]                     | <b>0.007</b>                             |
| <60y                                    | 104 (32)                       | 44 (25.3)                   | 57 (39.3)                      |                                          |
| 60y-75y                                 | 117 (36)                       | 62 (35.6)                   | 52 (35.9)                      |                                          |
| >75y                                    | 106 (32)                       | 68 (39.1)                   | 36 (24.8)                      |                                          |
| <b>Sex</b>                              |                                |                             |                                |                                          |
| Male                                    | 195 (60)                       | 109 (62.6)                  | 83 (57.2)                      | 0.326                                    |
| Female                                  | 132 (40)                       | 65 (37.4)                   | 62 (42.8)                      |                                          |
| <b>Tumor localization*</b>              |                                |                             |                                |                                          |
| Head and neck                           | 54 (22)                        | 32 (22.2)                   | 22 (20.6)                      | 0.864                                    |
| Trunk                                   | 73 (29)                        | 41 (28.5)                   | 32 (29.9)                      |                                          |
| Extremity                               | 109 (43)                       | 61 (42.4)                   | 48 (44.9)                      |                                          |
| Other                                   | 15 (6)                         | 10 (6.9)                    | 5 (4.7)                        |                                          |
| <b>Histological subtype*</b>            |                                |                             |                                |                                          |
| SSM                                     | 76 (32)                        | 36 (28.3)                   | 40 (36)                        | 0.210                                    |
| NM                                      | 72 (30)                        | 45 (35.4)                   | 27 (24.3)                      |                                          |
| LMM                                     | 13 (6)                         | 8 (6.3)                     | 5 (4.5)                        |                                          |
| ALM                                     | 30 (12)                        | 15 (11.8)                   | 15 (13.5)                      |                                          |
| Mucosal                                 | 15 (6)                         | 10 (7.9)                    | 5 (4.5)                        |                                          |
| Other                                   | 32 (14)                        | 13 (10.2)                   | 19 (17.1)                      |                                          |
| <b>Stage at initial diagnosis*</b>      |                                |                             |                                |                                          |
| I                                       | 48 (17)                        | 28 (18.3)                   | 20 (16.5)                      | 0.750                                    |
| II                                      | 84 (31)                        | 46 (30.1)                   | 38 (31.4)                      |                                          |
| III                                     | 95 (35)                        | 50 (32.7)                   | 45 (37.2)                      |                                          |
| IV                                      | 47 (17)                        | 29 (19)                     | 18 (14.9)                      |                                          |
| <b>Number of organs with metastases</b> |                                |                             |                                |                                          |
| 1-3                                     | 292 (89)                       | 161 (92.5)                  | 124 (85.5)                     | <b>0.043</b>                             |
| >3                                      | 35 (11)                        | 13 (7.5)                    | 21 (14.5)                      |                                          |
| <b>Brain metastases</b>                 |                                |                             |                                |                                          |
| No                                      | 264 (81)                       | 149 (85.6)                  | 109 (75.2)                     | <b>0.018</b>                             |
| Yes                                     | 63 (19)                        | 25 (14.4)                   | 36 (24.8)                      |                                          |
| <b>Liver metastases</b>                 |                                |                             |                                |                                          |
| No                                      | 209 (64)                       | 118 (67.8)                  | 86 (59.3)                      | 0.115                                    |
| Yes                                     | 118 (36)                       | 56 (32.2)                   | 59 (40.7)                      |                                          |
| <b>BRAF mutation*</b>                   |                                |                             |                                |                                          |
| BRAFmut                                 | 88 (45)                        | 42 (36.5)                   | 46 (58.2)                      | <b>0.003</b>                             |
| BRAFwt                                  | 106 (56)                       | 73 (63.5)                   | 33 (41.8)                      |                                          |
| <b>LDH level*</b>                       |                                |                             |                                |                                          |
| Normal                                  | 190 (68)                       | 101 (70.1)                  | 89 (65.4)                      | 0.400                                    |
| Elevated                                | 90 (32)                        | 43 (29.9)                   | 90 (32.1)                      |                                          |
| <b>S100B level*</b>                     |                                |                             |                                |                                          |
| Normal                                  | 157 (56)                       | 82 (55)                     | 75 (56.4)                      | 0.819                                    |
| Elevated                                | 125 (44)                       | 67 (45)                     | 58 (43.6)                      |                                          |

\* patients with no information available were excluded in the respective analysis; IQR = interquartile range; ♣  $\chi^2$  test performed between the two groups – PD-1 monotherapy and PD-1+CTLA4; ICI= immune-checkpoint inhibitors; y= years; SSM = superficial spreading melanoma; NM = nodular melanoma; LMM = lentigo malignant melanoma; ALM = acral lentiginous melanoma; BRAFmut = presence of BRAFV600E/K mutation; BRAFwt = BRAF wild-type; LDH = lactate dehydrogenase; S100B = tumor marker protein S100B

**Table S3:** Second line therapies in patients with primary resistance considering BRAF mutation status

| BRAF Mutation Status | N (%)       |             |             |                             |
|----------------------|-------------|-------------|-------------|-----------------------------|
|                      | IT (n = 25) | TT (n = 17) | CT (n = 21) | No Further Therapy (n = 64) |
| <b>BRAFwt</b>        | 10 (25)     | 0           | 10 (25)     | 20 (50)                     |
| <b>BRAFV600E/K</b>   | 3 (9.4)     | 17 (53.1)   | 1 (3.1)     | 11 (34.4)                   |
| <b>Unknown</b>       | 12 (21.8)   | 0           | 10 (18.2)   | 33 (60)                     |

IT = immunotherapy (PD-1 monotherapy or PD-1+CTLA-4); TT = targeted therapy (BRAF inhibitors and MEK inhibitors)  
CT = chemotherapy

**Table S4:** Best overall response to second line therapies in patients with primary resistance considering BRAF mutation status

|                                    | N (%)                |          |          |          |
|------------------------------------|----------------------|----------|----------|----------|
|                                    | BRAFV600E/K Patients |          |          |          |
|                                    | CR                   | PR       | SD       | PD       |
| <b>IT</b><br>n = 3                 | 0                    | 0        | 0        | 3 (100)  |
| <b>TT<sup>(a)</sup></b><br>n = 17  | 1 (6.3)              | 9 (56.3) | 3 (18.7) | 3 (18.7) |
| <b>CT</b><br>n = 1                 | 0                    | 0        | 0        | 1 (100)  |
| BRAFwt Patients                    |                      |          |          |          |
| <b>IT</b><br>n = 10 <sup>(b)</sup> | 0                    | 0        | 3 (33)   | 6 (67)   |
| <b>CT</b><br>n = 10 <sup>(b)</sup> | 0                    | 1 (11)   | 0        | 8 (89)   |

IT = immunotherapy (PD-1 monotherapy or PD-1+CTLA-4); TT = targeted therapy (BRAF inhibitors and MEK inhibitors)  
CT = chemotherapy; <sup>(a)</sup> In 1 patient there was no information regarding the best overall response to the second line systemic therapy; <sup>(b)</sup> In 1 patient in the IT group and in the CT group, there was no information available on the best overall response to the second line systemic therapy
